# Supplementary material for: The Wheat Annexin TaAnn12 Plays Positive Roles in Plant Disease Resistance by Regulating the Accumulation of Reactive Oxygen Species and Callose
Source: MDPI journal article supplement (doi:10.3390/ijms242216381), 2023-11-16
Supplement: s1 [file s1]

## SUPPLEMENTARY MATERIALS

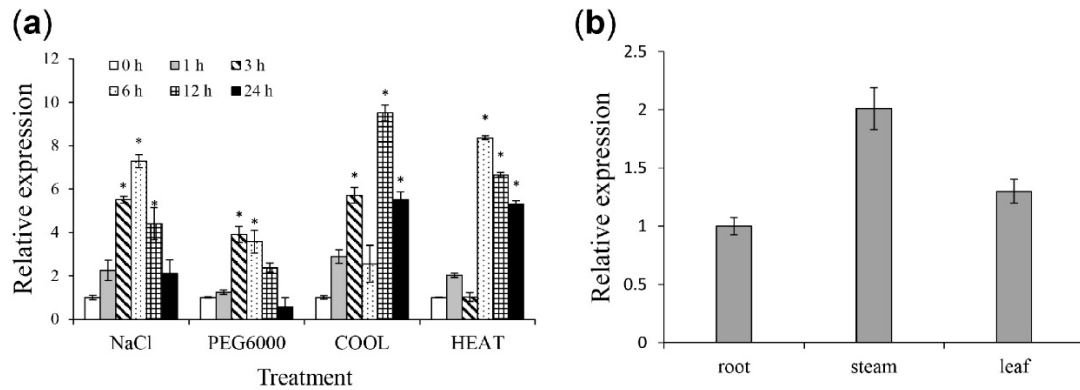

Figure S1: Real-time quantitative PCR (RT-qPCR) analysis of *TaAnn12* expression characteristics. **(a)** The transcription of *TaAnn12* response to abiotic stress. **(b)** Different distribution of *TaAnn12* in pivotal organs. The  $2^{-\Delta\Delta t}$  method was used to calculate the relative expression of genes. Error bars represent  $\pm$  SDs of three biological replications. Asterisks (\*) indicate significant differences ( $p < 0.05$ ) from 0 hpi.

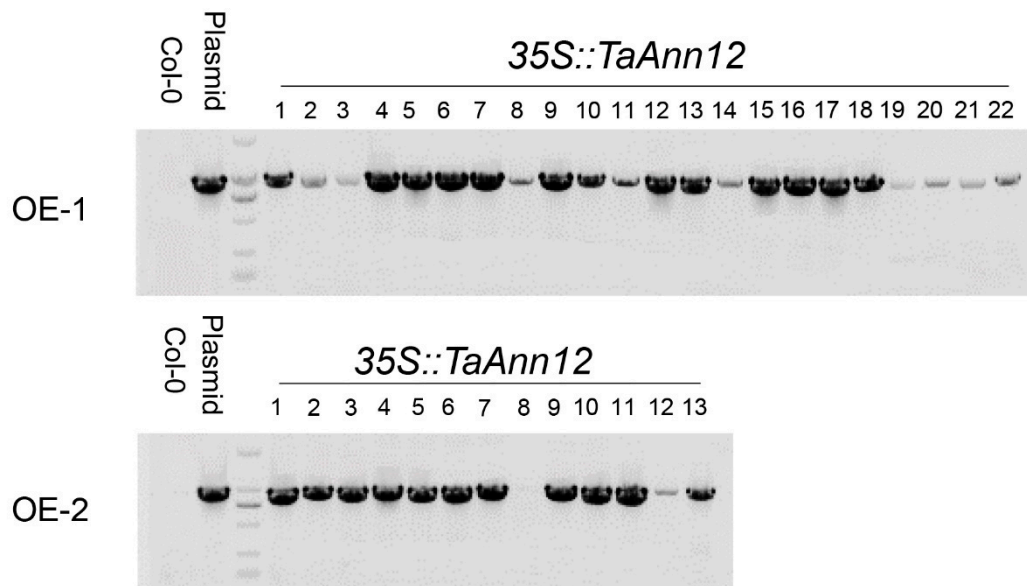

Figure S2: Identification of *TaAnn12* overexpression transgenic plants in T2 generations. Positive *TaAnn12* transgenic plants were identified using PCR.

Table S1. DNA primers used in this study.

| Target gene name              | Primer name | Sequence (5' to 3')                                |
|-------------------------------|-------------|----------------------------------------------------|
| Gene cloning                  | TaAnn12-C-F | GGCACTCCATTCGTCCACTC                               |
|                               | TaAnn12-C-R | TCATCGTAAAGCACATCTCT                               |
| RT-qPCR analysis              | TaAnn12-Q-F | TCTGAAGGCTGACCCCAAG                                |
|                               | TaAnn12-Q-R | GGAGTTCTCATCGGTTCCATT                              |
|                               | TaEF-Q-F    | TGCTGTCATCAAGCCTGGTATGGT                           |
|                               | TaEF-Q-R    | ACTCATGGTGCATCTCAACGGACT                           |
|                               | TaPR1-Q-F   | GAGAATGCAGACGCCCAAGC                               |
|                               | TaPR1-Q-R   | CTGGAGCTTGCAGTCGTTGATC                             |
|                               | TaPR2-Q-F   | AGGATGTTGCTTCCATGTTTGCCG                           |
|                               | TaPR2-Q-R   | AAGTAGATGCGCATGCCGTTGATG                           |
|                               | TaSOD-Q-F   | CCGAGGTCTGGAACCATCAC                               |
|                               | TaSOD-Q-R   | AGCCGAAATCCTTCTCGATCT                              |
|                               | TaCAT-Q-F   | TCGGACACCGAGGACCTATC                               |
|                               | TaCAT-Q-R   | CCGTGCATGAACAACACGTT                               |
|                               | TaNPR1-F    | CTCAAGGAAGGGCAGACCAAT                              |
|                               | TaNPR1-R    | GGCGGCAATGTGAAGAACAGTA                             |
|                               | NQEIF4A-F   | CGTAAGCATAGATACCCCTAAGAA                           |
|                               | NQEIF4A-R   | TGACCAGAGGCTGAATGAAGT                              |
|                               | AtPR1-F     | GTGCCAAAGTGAGGTGTAACAA                             |
|                               | AtPR1-R     | CGTGTGTATGCATGATCACATC                             |
|                               | AtPR2-F     | CTTAGCCTCACCACCAATGTTG                             |
|                               | AtPR2-R     | TCCCGTAGCATACTCCGATTTG                             |
|                               | AtPR5-F     | ATGTGAGCCTCGTAGATGGTTAC                            |
|                               | AtPR5-R     | GATCCATGACCTTAAGCATGTCTG                           |
|                               | AtPDF1.2-F  | CTTATCTTCGCTGATCTTGT                               |
|                               | AtPDF1.2-R  | CGTAACAGATACACTTGTGTGC                             |
| VIGS                          | TaAnn12-V-F | ccgttgctagctgagcCAGATGGGTCGCAAATGGG                |
|                               | TaAnn12-V-R | tagctagctgattaatGGAGTTCTCATCGGTTCCATT              |
| Overexpression in Arabidopsis | TaAnn12-O-F | agtccatggtaccg <b>gggatcc</b> ATGGCGACGCTCAAGGTC   |
|                               | TaAnn12-O-R | cacgggggactctag <b>gggatcc</b> TCACTCCTTCCCCAGGAGG |
